# Supplementary material for: Associations of Binge Drinking With the Risks of Ischemic Heart Disease and Stroke: A Study of Pooled Norwegian Health Surveys
Source: PubMed Central journal article supplement (PMC8489425; doi:10.1093/aje/kwab063), 2021-03-15
Supplement: Web_Material_kwab063.pdf [file Web_Material_kwab063.pdf]

# **Binge drinking and risk of ischemic heart disease and stroke: a study of pooled Norwegian health surveys**

Eirik Degerud, Gudrun Høiseth, Jørg Mørland, Inger Ariansen, Sidsel Graff-Iversen, Eivind Ystrom, Luisa Zuccolo, Grethe S. Tell, and Øyvind Næss.

## **Table of contents:**

- Web Figure 1: Flow-chart
- Web Tables 1-7:
  - Web Table 1: Characteristics of the surveys and alcohol questions
  - Web Table 2: HRs for IHD and stroke stratified by age
  - Web Table 3: HRs for IHD and stroke stratified by sex
  - Web Table 4: Sensitivity analysis: Lifetime non-drinkers in joint reference group with low-intake drinkers
  - Web Table 5: HRs for IHD using average drinking frequency instead of the average quantity of alcohol consumed
  - Web Table 6: HRs for stroke with average drinking frequency instead of the average quantity of alcohol consumed
  - Web Table 7: Sensitivity analysis: Binge drinking as categorical variable
- References

## Web Figure 1.

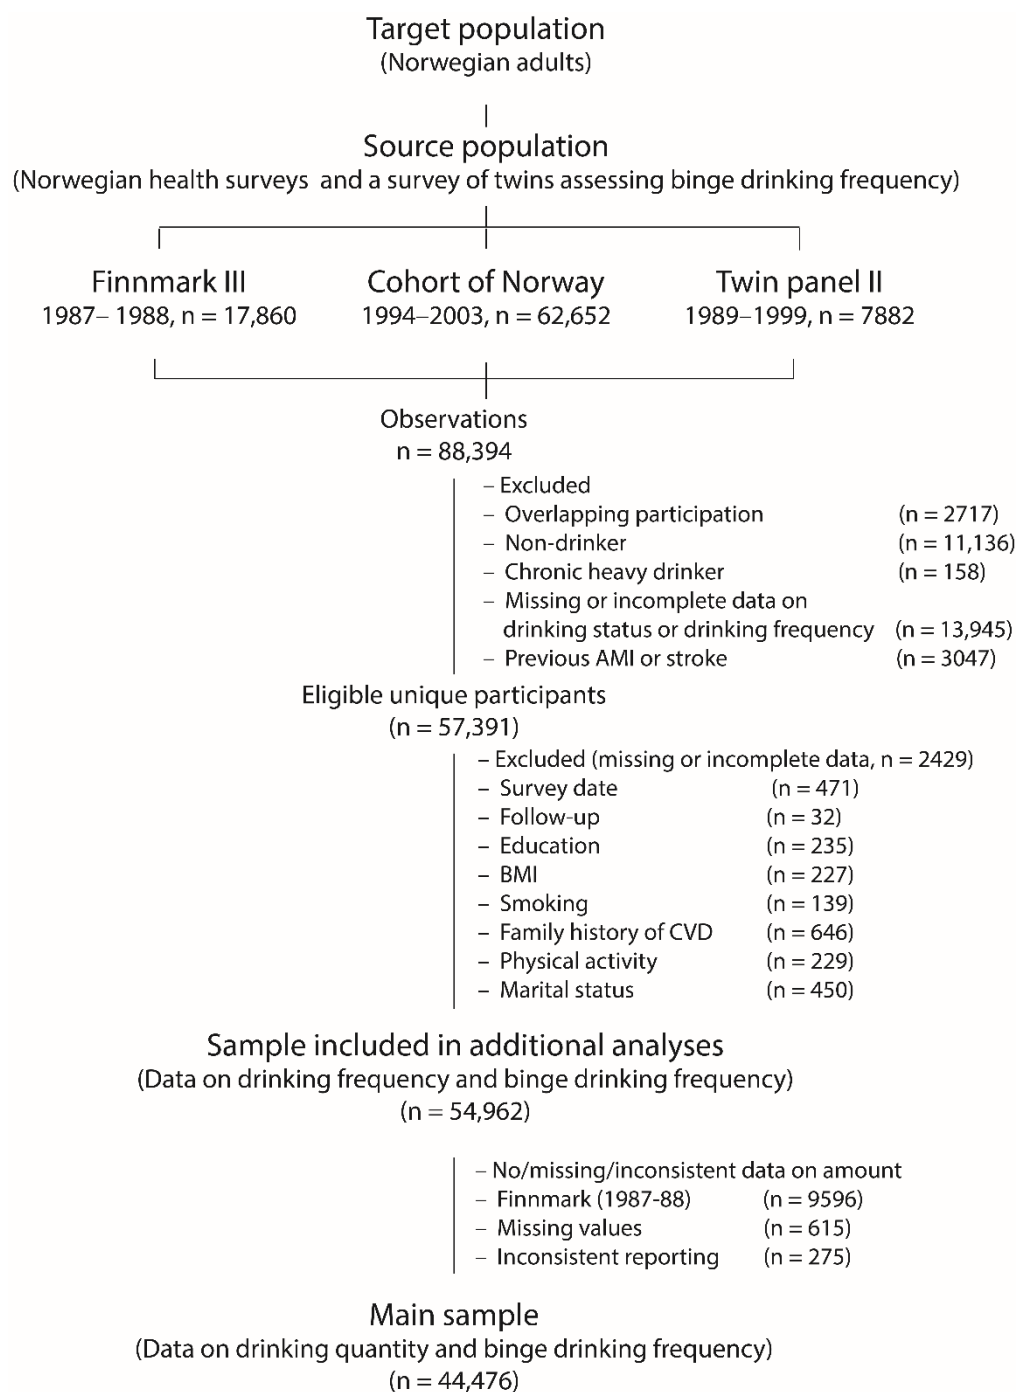

**Web Figure 1.** For the subgroup with data from more than one survey, we selected a single survey. Priority was a trade-off between the quality of alcohol data and the length of follow-up (Finnmark III > Cohort of Norway > Twin panel II). The excluded visits/observations are listed under “overlapping participation”.

**Web Table 1.** Characteristics and alcohol questions applied in the surveys that constituted the source population for this study.

|                                 | Survey year<br>(range) | Participants<br>(n) | Response<br>rate (%) | Age<br>(mean ± SD) | Age<br>(range) | Sex<br>(male) | Average drinking<br>frequency | Average<br>drinking<br>quantity | Binge<br>drinking<br>frequency |
|---------------------------------|------------------------|---------------------|----------------------|--------------------|----------------|---------------|-------------------------------|---------------------------------|--------------------------------|
| <b>The Counties Studies</b>     |                        |                     |                      |                    |                |               |                               |                                 |                                |
| Finnmark III                    | 1987-1988              | 17,860              | <u>77.5</u>          | 47.2 ± 9.3         | (19 – 82)      | 50.6          | A                             | NA                              | E                              |
| <b>Cohort of Norway (CONOR)</b> |                        |                     |                      |                    |                |               |                               |                                 |                                |
| HUBRO                           | 1996-2001              | 21,267              | <u>37.5</u>          | 48.4 ± 15.5        | (29.9 – 77.7)  | 44.5          | B                             | C                               | F                              |
| I-HUBRO                         | 2002                   | 3526                | <u>29.9</u>          | 38.8 ± 9.2         | (19.2 – 60.9)  | 52.0          | B                             | C                               | F                              |
| OSLO 2                          | 1996-2001              | 6890                | <u>48.7</u>          | 68.9 ± 6.2         | (47.4 – 78.1)  | 100           | B                             | C                               | F                              |
| OPPHED                          | 2000-2001              | 12,210              | <u>55.5</u>          | 50.1 ± 14.3        | (29.9 – 76.8)  | 45.7          | B                             | C                               | F                              |
| TROMSØ 5                        | 2001                   | 7833                | <u>78.0</u>          | 59.8 ± 14.1        | (29.5 – 88.9)  | 43.6          | B                             | C                               | F                              |
| MoRo II                         | 2003                   | 1956                | <u>35.9</u>          | 51.3 ± 9.7         | (33.3 – 70.2)  | 44.4          | B                             | C                               | F                              |
| REST-Troms                      | 2002                   | 2479                | <u>57.5</u>          | 49.0 ± 13.8        | (29.0 – 81.3)  | 43.6          | B                             | C                               | F                              |
| REST-FINN                       | 2002                   | 6491                | <u>57.5</u>          | 59.4 ± 11.0        | (29.3 – 77.7)  | 47.6          | B                             | C                               | F                              |
| <b>The Twin registry</b>        |                        |                     |                      |                    |                |               |                               |                                 |                                |
| Second panel                    | 1989-1999              | 7882                | <u>83.7</u>          | 49.4 ± 11.1        | (30.0 – 79.0)  | 45.6          | B                             | D                               | E*                             |

Questions used to assess alcohol intake:

- A) “How many glasses of beer, wine, or spirits do you usually drink during a two-week period?”
  - B) “How often during the past 12 months have you consumed alcohol?”
  - C) “How often during the past 12 months have you consumed alcohol” in combination with “When you drank alcohol, how many glasses did you usually drink?”
  - D) “How many glasses of beer, wine, or spirits do you usually drink during a week?”
  - E) “How often during the past year did you drink at least the equivalent of 5 small bottles of beer, a full bottle of wine (or ½ bottle of strong wine\*) or a ¼ bottle of liquor?”
  - F) Approximately how often during the past 12 months have you consumed alcohol corresponding to at least 5 glasses and/or spirits in 24 hours?
- NA = not assessed

For more information about the surveys, please consult the following references for information: Cohort of Norway (1); Finnmark III (2); and the Twin registry second panel (3).

**Web Table 2.** The number of events and hazard ratios with 95% confidence intervals for incident ischemic heart disease and stroke according to binge drinking frequency in different age groups among 44,476 Norwegian adult men and women who participated in a cardiovascular health examination survey in midlife (1987 – 2003) and reported to be currently drinking alcohol.

| <b>Binge drinking frequency</b> | <b>Average drinking quantity 2 – &lt;60 grams/day</b> |                                   |
|---------------------------------|-------------------------------------------------------|-----------------------------------|
|                                 | <b>Age &lt;50 years (n = 17,118)</b>                  | <b>Age ≥50 years (n = 11,026)</b> |
| <b>Ischemic heart disease</b>   |                                                       |                                   |
| <u>Event/no event (n)</u>       |                                                       |                                   |
| All                             | 156/16,962                                            | 673/10,353                        |
| Never/infrequent                | 92/9921                                               | 541/8189                          |
| Frequent                        | 64/7041                                               | 132/2164                          |
| <u>HR (95% CI)</u>              |                                                       |                                   |
| Never/infrequent                | 1.00                                                  |                                   |
| Frequent <sup>1</sup>           | 0.95 (0.69, 1.32)                                     | 0.97 (0.80, 1.18)                 |
| Frequent <sup>2</sup>           | 0.71 (0.51, 1.00)                                     | 0.94 (0.77, 1.14)                 |
| Frequent <sup>3</sup>           | 0.70 (0.49, 1.00)                                     | 0.97 (0.78, 1.20)                 |
| <b>Stroke</b>                   |                                                       |                                   |
| <u>Event/no event (n)</u>       |                                                       |                                   |
| All                             | 93/17,025                                             | 694/10,332                        |
| Never/infrequent                | 52/9961                                               | 560/8170                          |
| Frequent                        | 41/7064                                               | 134/2162                          |
| <u>HR (95% CI)</u>              |                                                       |                                   |
| Never/infrequent                | 1.00                                                  |                                   |
| Frequent <sup>1</sup>           | 1.40 (0.91, 2.14)                                     | 1.09 (0.90, 1.32)                 |
| Frequent <sup>2</sup>           | 1.26 (0.81, 1.94)                                     | 1.04 (0.85, 1.26)                 |
| Frequent <sup>3</sup>           | 1.21 (0.76, 1.93)                                     | 0.94 (0.76, 1.17)                 |

Binge drinking frequency was dichotomised into frequent (heavy episodic drinking; +60 grams of alcohol per occasion at least once per month) and never/infrequent (+60 grams of alcohol per occasion less frequent than once per month). Hazard ratios (HRs) and 95% confidence intervals (CIs) derived from Cox models adjusted for <sup>1</sup>) age and sex; <sup>2</sup>) plus education, marital status, smoking, physical activity, body mass index and familial history of coronary heart disease; <sup>3</sup>) plus average drinking quantity.

**Web Table 3.** The number of events and hazard ratios with 95% confidence intervals for incident ischemic heart disease and stroke according to binge drinking frequency in strata of men and women who participated in a cardiovascular health examination survey in midlife (1987 – 2003) and reported drinking alcohol in the range of 2 – <60 g/day.

| Binge drinking frequency      | Average drinking quantity 2 – <60 grams/day |                   |
|-------------------------------|---------------------------------------------|-------------------|
|                               | Women (n = 11,677)                          | Men (n = 16,467)  |
| <b>Ischemic heart disease</b> |                                             |                   |
| <u>Event/no event (n)</u>     |                                             |                   |
| All                           | 128/11,549                                  | 701/15,766        |
| Never/infrequent              | 111/8835                                    | 522/9275          |
| Frequent                      | 17/2714                                     | 179/6491          |
| <u>HR (95% CI)</u>            |                                             |                   |
| Never/infrequent              | 1.00                                        | 1.00              |
| Frequent <sup>1</sup>         | 1.16 (0.68, 1.97)                           | 0.94 (0.79, 1.12) |
| Frequent <sup>2</sup>         | 0.97 (0.56, 1.67)                           | 0.88 (0.73, 1.05) |
| Frequent <sup>3</sup>         | 0.94 (0.53, 1.67)                           | 0.90 (0.74, 1.09) |
| <b>Stroke</b>                 |                                             |                   |
| <u>Event/no event (n)</u>     |                                             |                   |
| All                           | 192/11,485                                  | 595/15,872        |
| Never/infrequent              | 161/8785                                    | 451/9346          |
| Frequent                      | 31/2700                                     | 144/6526          |
| <u>HR (95% CI)</u>            |                                             |                   |
| Never/infrequent              | 1.00                                        | 1.00              |
| Frequent <sup>1</sup>         | 1.56 (1.04, 2.33)                           | 1.06 (0.87, 1.28) |
| Frequent <sup>2</sup>         | 1.41 (0.93, 2.12)                           | 1.02 (0.83, 1.24) |
| Frequent <sup>3</sup>         | 1.27 (0.82, 1.96)                           | 0.93 (0.75, 1.16) |

Binge drinking frequency was dichotomised into frequent (heavy episodic drinking; +60 grams of alcohol per occasion at least once per month) and never/infrequent (+60 grams of alcohol per occasion less frequent than once per month). Hazard ratios (HRs) and 95% confidence intervals (CIs) derived from Cox models adjusted for <sup>1</sup>) age; <sup>2</sup>) plus education, marital status, smoking, physical activity, body mass index and familial history of coronary heart disease; <sup>3</sup>) plus average drinking quantity.

**Web Table 4.** The number of events and hazard ratios with 95% confidence intervals for incident ischemic heart disease and stroke according to average drinking quantity among 43,039 participants in the Cohort of Norway. Lifetime non-drinkers were included in the reference category together with low intake drinkers (<2 g/day). Current abstainers and chronic heavy drinkers were included in the models.

| <i>Binge drinking frequency</i>                                     | <i>Average drinking quantity (grams/day)</i> |                   |                    |                    |                   |
|---------------------------------------------------------------------|----------------------------------------------|-------------------|--------------------|--------------------|-------------------|
|                                                                     | <i>&lt;2 and lifetime non-drinkers</i>       | <i>2 – &lt;12</i> | <i>12 – &lt;24</i> | <i>24 – &lt;60</i> | <i>2 – &lt;60</i> |
| <b>Ischemic heart disease</b>                                       |                                              |                   |                    |                    |                   |
| <u>Event/no event (n)</u>                                           |                                              |                   |                    |                    |                   |
| All                                                                 | 620/13,996                                   | 550/20,032        | 117/3777           | 33/905             | 700/24,714        |
| Never/infrequent                                                    | -                                            | 475/14,816        | 62/1344            | 13/165             | 550/16,325        |
| Frequent                                                            | -                                            | 75/5216           | 55/2433            | 20/740             | 150/8389          |
| <u>Hazard ratio (95% CI) according to average drinking quantity</u> |                                              |                   |                    |                    |                   |
| All <sup>1</sup>                                                    | 1.00                                         | 0.70 (0.63, 0.79) | 0.66 (0.54, 0.81)  | 0.73 (0.51, 1.04)  | 0.70 (0.62, 0.78) |
| All <sup>2</sup>                                                    | 1.00                                         | 0.73 (0.65, 0.82) | 0.70 (0.57, 0.86)  | 0.68 (0.48, 0.97)  | 0.72 (0.64, 0.81) |
| Never/infrequent <sup>2</sup>                                       | 1.00                                         | 0.73 (0.65, 0.82) | 0.71 (0.54, 0.92)  | 0.89 (0.51, 1.55)  | 0.73 (0.65, 0.82) |
| Frequent <sup>2</sup>                                               | 1.00                                         | 0.61 (0.47, 0.79) | 0.62 (0.47, 0.83)  | 0.55 (0.35, 0.86)  | 0.61 (0.50, 0.74) |
| <b>Stroke</b>                                                       |                                              |                   |                    |                    |                   |
| <u>Event/no event (n)</u>                                           |                                              |                   |                    |                    |                   |
| All                                                                 | 483/14,133                                   | 516/20,066        | 117/3777           | 49/889             | 682/24,732        |
| Never/infrequent                                                    | -                                            | 442/14,849        | 73/1333            | 20/158             | 535/16,340        |
| Frequent                                                            | -                                            | 74/5217           | 44/2444            | 29/731             | 147/8392          |
| <u>Hazard ratio (95% CI) according to average drinking quantity</u> |                                              |                   |                    |                    |                   |
| All <sup>1</sup>                                                    | 1.00                                         | 0.96 (0.85, 1.09) | 1.02 (0.83, 1.25)  | 1.72 (1.28, 2.32)  | 1.00 (0.89, 1.13) |
| All <sup>2</sup>                                                    | 1.00                                         | 0.97 (0.86, 1.11) | 1.03 (0.84, 1.27)  | 1.60 (1.19, 2.17)  | 1.01 (0.89, 1.14) |
| Never/infrequent <sup>2</sup>                                       | 1.00                                         | 0.95 (0.83, 1.08) | 1.15 (0.90, 1.48)  | 2.12 (1.35, 3.32)  | 0.99 (0.87, 1.12) |
| Frequent <sup>2</sup>                                               | 1.00                                         | 1.11 (0.85, 1.44) | 0.83 (0.60, 1.15)  | 1.34 (0.91, 1.98)  | 1.04 (0.85, 1.28) |

Binge drinking frequency was dichotomised into frequent (heavy episodic drinking; +60 grams of alcohol per occasion at least once per month) and never/infrequent (+60 grams of alcohol per occasion less frequent than once per month). Hazard ratios (HRs) and 95% confidence intervals (CIs) derived from Cox models adjusted for <sup>1</sup>) age and sex; <sup>2</sup>) plus education, marital status, smoking, physical activity, body mass index and familial history of coronary heart disease. Participants with intakes <2 g/day and lifetime abstainers constituted the joint reference category. Current

abstainers (n = 2601) and chronic heavy drinkers (n = 104) were included in the overall models, but not in the models stratified by binge drinking frequency.

**Web Table 5.** The number of events and hazard ratios with 95% confidence intervals for incident ischemic heart disease according to binge drinking frequency and average drinking frequency among 54,962 participants in a cardiovascular health examination survey in midlife (1987 – 2003) who reported to be currently drinking alcohol.

| <i>Binge drinking frequency</i>                                      | <i>Average drinking frequency</i> |                         |                   |                   |                          |
|----------------------------------------------------------------------|-----------------------------------|-------------------------|-------------------|-------------------|--------------------------|
|                                                                      | <i>Infrequent</i>                 | <i>1/month – 1/week</i> | <i>2 – 3/week</i> | <i>≥4 week</i>    | <i>1/month – ≥4 week</i> |
| <u>Event/no event (n)</u>                                            |                                   |                         |                   |                   |                          |
| All                                                                  | 730/11,35                         | 1323/29,551             | 417/9051          | 128/2406          | 1868/41,008              |
| Never/infrequent                                                     | –                                 | 1069/23,153             | 243/4981          | 78/1193           | 1390/29,327              |
| Frequent                                                             | –                                 | 254/6398                | 174/4070          | 50/1213           | 478/11,681               |
| <u>HR (95% CI) according to binge drinking frequency<sup>§</sup></u> |                                   |                         |                   |                   |                          |
| Never/infrequent                                                     | –                                 | 1.00                    | 1.00              | 1.00              | 1.00                     |
| Frequent <sup>1</sup>                                                | –                                 | 1.19 (1.03, 1.38)       | 1.10 (0.88, 1.36) | 0.66 (0.45, 0.98) | 1.02 (0.92, 1.14)        |
| Frequent <sup>2</sup>                                                | –                                 | 1.00 (0.86, 1.16)       | 0.95 (0.76, 1.18) | 0.61 (0.41, 0.90) | 0.90 (0.81, 1.01)        |
| Frequent <sup>3</sup>                                                | –                                 | –                       | –                 | –                 | 0.96 (0.85, 1.07)        |
| <u>HR (95% CI) according to average drinking frequency*</u>          |                                   |                         |                   |                   |                          |
| All <sup>1</sup>                                                     | 1.00                              | 0.82 (0.75, 0.90)       | 0.68 (0.60, 0.77) | 0.57 (0.47, 0.69) | 0.77 (0.70, 0.84)        |
| All <sup>2</sup>                                                     | 1.00                              | 0.86 (0.79, 0.95)       | 0.75 (0.66, 0.85) | 0.65 (0.53, 0.78) | 0.82 (0.75, 0.90)        |
| All <sup>3</sup>                                                     | 1.00                              | 0.87 (0.79, 0.95)       | 0.76 (0.67, 0.87) | 0.66 (0.54, 0.80) | 0.84 (0.77, 0.92)        |
| Never/infrequent <sup>3</sup>                                        | 1.00                              | 0.86 (0.79, 0.95)       | 0.74 (0.64, 0.86) | 0.74 (0.58, 0.94) | 0.84 (0.76, 0.92)        |
| Frequent <sup>3</sup>                                                | 1.00                              | 0.83 (0.71, 0.97)       | 0.76 (0.64, 0.91) | 0.54 (0.40, 0.73) | 0.76 (0.67, 0.87)        |

Binge drinking frequency was dichotomised into frequent (heavy episodic drinking; +60 grams of alcohol per occasion at least once per month) and never/infrequent (+60 grams of alcohol per occasion less frequent than once per month). Hazard ratios (HRs) and 95% confidence intervals (CIs) derived from Cox models adjusted for <sup>1</sup>) age and sex; <sup>2</sup>) plus education, marital status, smoking, physical activity, body mass index and familial history of coronary heart disease; <sup>3</sup>) plus average drinking frequency or binge drinking frequency, as appropriate. <sup>§</sup>Infrequent drinkers (<once/month) were not included in analyses comparing binge drinking frequency directly, but used as the reference category in analyses of drinking frequency.



**Web Table 6.** The number of events and hazard ratios with 95% confidence intervals for incident stroke according to binge drinking frequency and average drinking frequency among 54,962 participants in a cardiovascular health examination survey in midlife (1987 – 2003) who reported to be currently drinking alcohol.

| <b>Binge drinking frequency</b>                                      | <b>Average drinking frequency</b> |                         |                   |                   |                          |
|----------------------------------------------------------------------|-----------------------------------|-------------------------|-------------------|-------------------|--------------------------|
|                                                                      | <b>Infrequent</b>                 | <b>1/month – 1/week</b> | <b>2 – 3/week</b> | <b>≥4 week</b>    | <b>1/month – ≥4 week</b> |
| <b>All events</b>                                                    |                                   |                         |                   |                   |                          |
| <u>Event/no event (n)</u>                                            |                                   |                         |                   |                   |                          |
| All                                                                  | 510/11,576                        | 988/29,886              | 369/9099          | 152/2382          | 1509/41,367              |
| Never/infrequent                                                     | –                                 | 827/23,395              | 221/5003          | 88/1183           | 1136/29,581              |
| Frequent                                                             | –                                 | 161/6491                | 148/4096          | 64/1199           | 373/11,786               |
| <u>HR (95% CI) according to binge drinking frequency<sup>§</sup></u> |                                   |                         |                   |                   |                          |
| Never/infrequent                                                     | –                                 | 1.00                    | 1.00              | 1.00              | 1.00                     |
| Frequent <sup>1</sup>                                                | –                                 | 1.22 (1.02, 1.46)       | 1.42 (1.13, 1.79) | 0.90 (0.63, 1.27) | 1.24 (1.10, 1.41)        |
| Frequent <sup>2</sup>                                                | –                                 | 1.08 (0.90, 1.29)       | 1.29 (1.02, 1.63) | 0.89 (0.62, 1.26) | 1.13 (1.00, 1.28)        |
| Frequent <sup>3</sup>                                                | –                                 | –                       | –                 | –                 | 1.11 (0.97, 1.27)        |
| <u>HR (95% CI) according to average drinking frequency*</u>          |                                   |                         |                   |                   |                          |
| All <sup>1</sup>                                                     | 1.00                              | 0.98 (0.88, 1.10)       | 1.00 (0.87, 1.15) | 1.07 (0.89, 1.29) | 1.00 (0.90, 1.10)        |
| All <sup>2</sup>                                                     | 1.00                              | 1.02 (0.91, 1.14)       | 1.06 (0.92, 1.22) | 1.15 (0.95, 1.39) | 1.04 (0.93, 1.15)        |
| All <sup>3</sup>                                                     | 1.00                              | 1.00 (0.90, 1.12)       | 1.02 (0.88, 1.19) | 1.10 (0.90, 1.34) | 1.01 (0.91, 1.13)        |
| Never/infrequent <sup>3</sup>                                        | 1.00                              | 1.01 (0.90, 1.13)       | 0.97 (0.82, 1.14) | 1.11 (0.88, 1.40) | 1.01 (0.90, 1.12)        |
| Frequent <sup>3</sup>                                                | 1.00                              | 1.02 (0.84, 1.24)       | 1.18 (0.97, 1.44) | 1.15 (0.87, 1.51) | 1.10 (0.95, 1.28)        |

Binge drinking frequency was dichotomised into frequent (heavy episodic drinking; +60 grams of alcohol per occasion at least once per month) and never/infrequent (+60 grams of alcohol per occasion less frequent than once per month). Hazard ratios (HRs) and 95% confidence intervals (CIs) derived from Cox models adjusted for <sup>1</sup>) age and sex; <sup>2</sup>) plus education, marital status, smoking, physical activity, body mass index and familial history of coronary heart disease; <sup>3</sup>) plus average drinking frequency or binge drinking frequency, as appropriate. <sup>§</sup>Infrequent drinkers (<once/month) were not included in analyses comparing binge drinking frequency directly, but used as the reference category in analyses of drinking frequency.

**Web Table 7.** The number of events and hazard ratios with 95% confidence intervals for incident ischemic heart disease and stroke according to binge drinking frequency among 25,582 participants reporting binge drinking the last year in when attending a cardiovascular health examination survey in midlife (1987 – 2003).

|                               |   | <u>Binge drinking frequency</u> |                                       |                                     |                                   |
|-------------------------------|---|---------------------------------|---------------------------------------|-------------------------------------|-----------------------------------|
|                               |   | Not last year<br>(not included) | A few times last year<br>(n = 16,181) | 1 – 3 times per month<br>(n = 7420) | Once a week or more<br>(n = 1981) |
| <b>Ischemic heart disease</b> |   |                                 |                                       |                                     |                                   |
| Event/no event (n)            |   |                                 | 444/15,737                            | 143/7277                            | 53/1928                           |
| HR (95% CI) <sup>1</sup>      | - |                                 | 1.00                                  | 0.79 (0.65, 0.99)                   | 1.04 (0.78, 1.38)                 |
| HR (95% CI) <sup>2</sup>      | - |                                 | 1.00                                  | 0.79 (0.65, 0.95)                   | 0.97 (0.73, 1.30)                 |
| HR (95% CI) <sup>3</sup>      | - |                                 | 1.00                                  | 0.83 (0.68, 1.02)                   | 1.03 (0.77, 1.39)                 |
| <b>Stroke</b>                 |   |                                 |                                       |                                     |                                   |
| Event/no event (n)            |   |                                 | 332/15,849                            | 138/7282                            | 37/1944                           |
| HR (95% CI) <sup>1</sup>      | - |                                 | 1.00                                  | 1.12 (0.92, 1.37)                   | 1.10 (0.78, 1.55)                 |
| HR (95% CI) <sup>2</sup>      | - |                                 | 1.00                                  | 1.11 (0.90, 1.35)                   | 1.03 (0.73, 1.46)                 |
| HR (95% CI) <sup>3</sup>      | - |                                 | 1.00                                  | 1.13 (0.92, 1.40)                   | 1.06 (0.75, 1.51)                 |

Hazard ratios (HRs) and 95% confidence intervals (CIs) derived from Cox models adjusted for 1) age and sex; 2) plus education, marital status, smoking, physical activity, body mass index and familial history of coronary heart disease; 3) plus average drinking quantity.

## References:

1. Naess O, Sogaard AJ, Arnesen E, Beckstrom AC, Bjertness E, Engeland A, et al. Cohort profile: cohort of Norway (CONOR). *Int J Epidemiol*. 2008;37(3):481-5.
2. Graff-Iversen S, Jansen MD, Hoff DA, Hoiseth G, Knudsen GP, Magnus P, et al. Divergent associations of drinking frequency and binge consumption of alcohol with mortality within the same cohort. *J Epidemiol Community Health*. 2013;67(4):350-7.
3. Magnus P, Berg K, Nance WE. Predicting zygoty in Norwegian twin pairs born 1915-1960. *Clin Genet*. 1983;24(2):103-12.
